# Supplementary material
Source: HighWire-hosted journal article supplement (https://jnm.snmjournals.org/highwire/filestream/108211/field_highwire_adjunct_files/0/262205_Supplemental_Data.pdf)
Supplement: 262205_Supplemental_Data.pdf [file 262205_Supplemental_Data.pdf]

**SUPPLEMENTAL TABLE 1 Uni- and multivariable Cox Proportional Hazard analyses including baseline MTV for 2-year PFS (n=296)**

|                                                              | 2-year PFS               |          |                             |          |
|--------------------------------------------------------------|--------------------------|----------|-----------------------------|----------|
|                                                              | Univariate<br>HR (95%CI) | p-value  | Multivariable<br>HR (95%CI) | p-value  |
| <b>Age (≤60 vs &gt;60)</b>                                   | 1.44 (0.80-2.59)         | 0.222    | 1.83 (1.01-3.32)            | 0.046    |
| <b>aaPI (low/low-intermediate vs high-intermediate/high)</b> | 2.83 (1.50-5.34)         | 0.001*   |                             |          |
| <b>B symptoms (no vs yes)</b>                                | 1.97 (1.18-3.30)         | 0.010*   | 1.75 (1.04-2.98)            | 0.036    |
| <b>Baseline MTV log-transformed</b>                          | 1.43 (1.16-1.76)         | 0.001*   | 1.32 (1.07-1.62)            | 0.010    |
| <b>ΔSUVmax (&gt;70% vs ≤70%)</b>                             | 7.44 (4.29-12.92)        | <0.0001* | 7.87 (4.48-13.83)           | <0.0001* |
| <b>Gender (male vs female)</b>                               | 0.73 (0.44-1.23)         | 0.240    |                             |          |
| <b>Treatment arm (R-CHOP14 vs RR-CHOP14)</b>                 | 0.85 (0.51-1.42)         | 0.539    |                             |          |

\* Statistically significant difference

Abbreviations: 95%CI= 95% confidence interval; aaPI= age-adjusted international prognostic index; HR= Hazard Ratio; LDH= lactate dehydrogenase; MTV=metabolic tumor volume; PFS= progression-free survival; WHO= world health organization

**SUPPLEMENTAL TABLE 2 I-PET4 and EoT-PET 2x2 contingency table**

|                                     | <b>EoT-PET<br/>positive<br/>(DS 4-5)</b> | <b>EoT-PET<br/>negative<br/>(DS 1-3)</b> | <b>Total</b> |
|-------------------------------------|------------------------------------------|------------------------------------------|--------------|
| <b>I-PET4 positive<br/>(DS 4-5)</b> | 54                                       | 42~                                      | 96           |
| <b>I-PET4 negative<br/>(DS 1-3)</b> | 20^                                      | 358                                      | 378          |
| <b>Total</b>                        | 74 *                                     | 400 †                                    | 474          |

*Abbreviations: DS= Deauville 5-point scale; EoT-PET= end-of-treatment <sup>18</sup>F-FDG PET(/CT); I-PET4= interim <sup>18</sup>F-FDG PET(/CT) after four treatment cycles.*

*\*No I-PET4 was performed in 5 patients with positive EoT-PET (reasons unknown)*

*†No I-PET4 was performed in 14 patients with negative EoT-PET(reasons unknown), in 3 patients I-PET4 was not available for qualitative analysis (high glucose, poor visual quality and not interpretable due to missing baseline scan, respectively)*

*^ Twenty patients (4.2%) switched from a negative I-PET4 to a positive EoT-PET, sixteen of these patients had a high-intermediate or high aalPI and had a 2-year PFS of 40% (95%CI 18-62%).*

*~ Forty-two patients (8.9%) had a positive I-PET4 and turned negative at EoT-PET, of these only 4 patients had progressive disease within 2 years after randomization of whom 2 died within this period. These converting patients had a 2-year PFS of 90% (95%CI 81-99%).*

**SUPPLEMENTAL TABLE 3** Diagnostic and prognostic measures for aaIPI, baseline MTV, for different cut-off values of the Deauville 5-point scale at I-PET4, and  $\Delta$ SUVmax for 2-year PFS for subset of patients with baseline MTV analysis ( $n=296$ )

|                                  |                            | Diagnostic information |                                    |                                    |                      | Prognostic information |                                 | Discrimination |                  |
|----------------------------------|----------------------------|------------------------|------------------------------------|------------------------------------|----------------------|------------------------|---------------------------------|----------------|------------------|
|                                  |                            | Number of patients (n) | Negative Predictive Value %(95%CI) | Positive Predictive Value %(95%CI) | Sensitivity %(95%CI) | Specificity %(95%CI)   | Univariate Hazard Ratio (95%CI) | p-value        | AUC (95%CI)      |
| <b>AaIPI</b>                     | <b>L/LI vs HI/H</b>        | 118 vs 178             | 89.8 (83.1-94.1)                   | 26.4 (20.5-33.3)                   | 79.7 (67.7-88.0)     | 44.7 (38.5-51.2)       | 2.83 (1.50-5.34)                | 0.0013         | 0.61 (0.55-0.67) |
| <b>Baseline MTV</b>              | <b>≤345ml vs &gt;345ml</b> | 137 vs 159             | 86.1 (79.4-90.9)                   | 25.2 (19.2-32.4)                   | 67.8 (55.1-78.3)     | 49.8 (43.5-56.1)       | 1.96 (1.13-3.38)                | 0.0161         | 0.58 (0.52-0.65) |
| <b>I-PET4</b>                    | <b>DS1 vs DS2-5</b>        | 88 vs 208              | 84.1 (75.1-90.7)                   | 21.6 (16.6-27.7)                   | 76.3 (64.0-85.3)     | 31.2 (25.7-37.4)       | 1.42 (0.78-2.59)                | 0.252          | 0.54 (0.48-0.59) |
|                                  | <b>DS1-2 vs DS3-5</b>      | 159 vs 137             | 86.8 (80.7-91.2)                   | 27.7 (20.9-35.8)                   | 64.4 (51.7-75.4)     | 58.2 (51.9-64.3)       | 2.39 (1.40-4.07)                | 0.0014         | 0.61 (0.55-0.67) |
|                                  | <b>DS1-3 vs DS4-5</b>      | 226 vs 70              | 86.7 (81.7-90.5)                   | 41.4 (30.6-53.1)                   | 49.2 (36.8-61.6)     | 82.7 (77.4-87.0)       | 3.99 (2.39-6.66)                | <0.0001        | 0.65 (0.60-0.70) |
|                                  | <b>DS1-4 vs DS5</b>        | 280 vs 16              | 83.2 (78.4-87.1)                   | 75.0 (50.5-89.8)                   | 20.3 (12.0-32.3)     | 98.3 (95.7-99.3)       | 9.49 (5.00-18.01)               | <0.0001        | 0.59 (0.57-0.62) |
| <b><math>\Delta</math>SUVmax</b> | <b>&gt;70% vs ≤70%</b>     | 266 vs 30              | 85.0 (80.2-88.8)                   | 63.3 (45.5-78.1)                   | 32.2 (21.7-44.9)     | 95.4 (91.9-97.4)       | 7.46 (4.30-12.95)               | <0.0001        | 0.64 (0.61-0.67) |

*Abbreviations: 95%CI= 95% confidence interval; AaIPI= age-adjusted international prognostic index; AUC= area under the receiver*

*operating curve; DS= Deauville 5-point scale;  $\Delta$ SUVmax= reduction of maximum standardized uptake value between baseline and interim*

*18F-FDG PET(/CT); H=high risk group; HI= high-intermediate risk group; I-PET= interim 18F-FDG PET(/CT) after four cycles; MTV= metabolic*

*tumor volume; PFS= progression-free survival*

**SUPPLEMENTAL TABLE 4 Uni- and multivariable Cox Proportional Hazard analyses of  $\Delta$ SUVmax analysis-group for 2-year PFS (n=367)**

|                                                                                    | 2-year PFS               |          |                             |          |
|------------------------------------------------------------------------------------|--------------------------|----------|-----------------------------|----------|
|                                                                                    | Univariate<br>HR (95%CI) | p-value  | Multivariable<br>HR (95%CI) | p-value  |
| <b>Age (<math>\leq 60</math> vs <math>&gt;60</math>)</b>                           | 1.60 (0.95-2.69)         | 0.075    |                             |          |
| <b>aaPI (low/low-intermediate vs high-intermediate/high)</b>                       | 3.16 (1.80-5.55)         | <0.0001* | 3.27 (1.86-5.75)            | <0.0001* |
| <b>B symptoms (no vs yes)</b>                                                      | 1.67 (1.07-2.61)         | 0.025*   |                             |          |
| <b><math>\Delta</math>SUVmax (<math>&gt;70\%</math> vs <math>\leq 70\%</math>)</b> | 4.80 (2.88-8.00)         | <0.0001* | 5.01 (3.00-8.36)            | <0.0001* |
| <b>Gender (male vs female)</b>                                                     | 1.25 (0.80-1.96)         | 0.335    |                             |          |
| <b>Treatment arm (R-CHOP14 vs RR-CHOP14)</b>                                       | 0.99 (0.63-1.54)         | 0.957    |                             |          |

\* Statistically significant difference

Abbreviations: 95%CI= 95% confidence interval; aaPI= age-adjusted international prognostic index;  $\Delta$ SUVmax= reduction of maximum standardized uptake value between baseline and interim 18F-FDG PET(/CT); HR= Hazard Ratio; LDH= lactate dehydrogenase; PFS= progression-free survival; WHO= world health organization

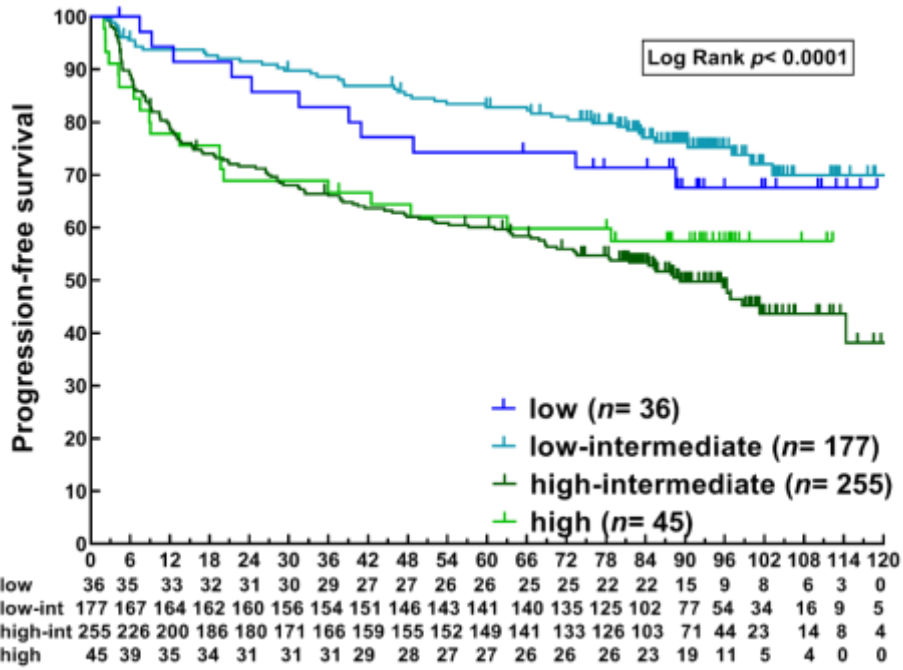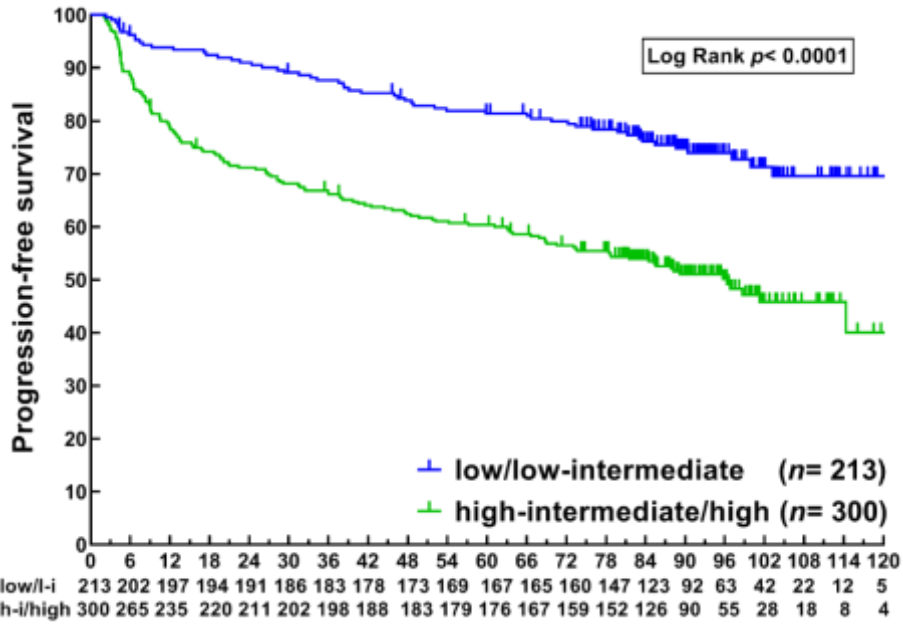

**SUPPLEMENTAL FIGURE 1** Kaplan-Meier curves for progression-free survival in months stratified by ordinal aaPI (1a) and dichotomized aaPI (1b)

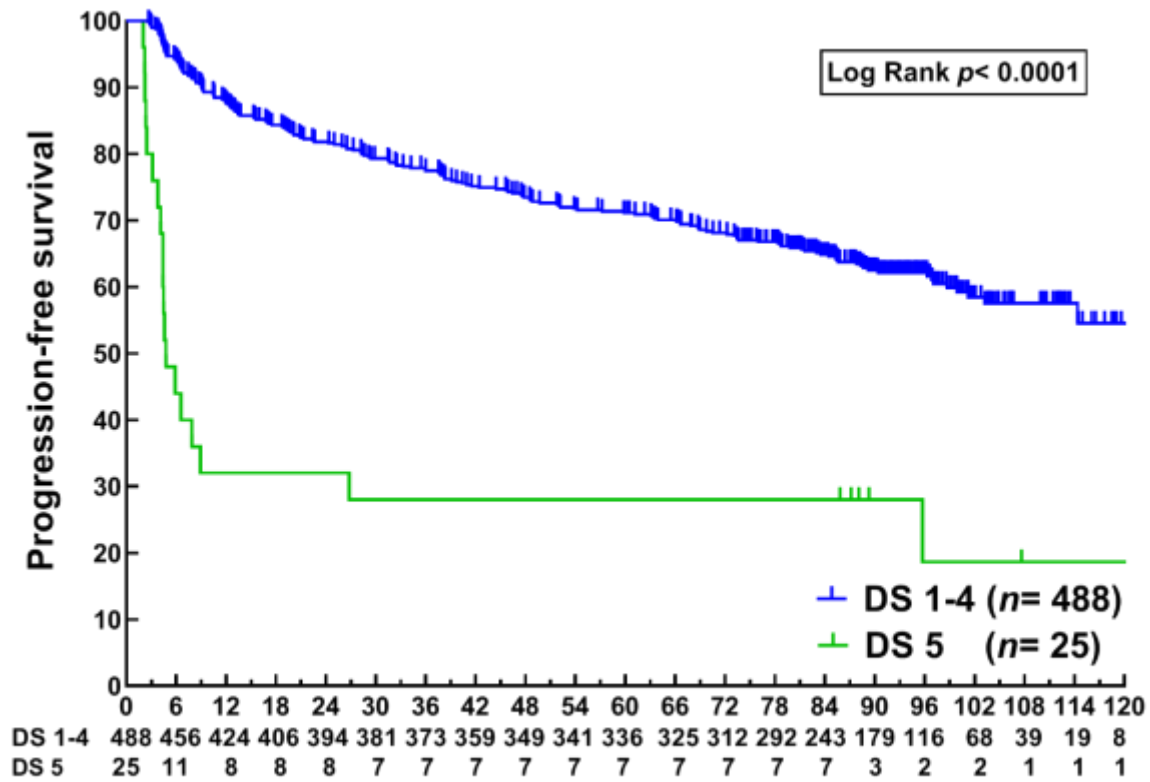

SUPPLEMENTAL FIGURE 2 Kaplan-Meier curves for I-PET4 with numbers at risk for progression-free survival in months stratified by DS1-4 vs DS5 result.

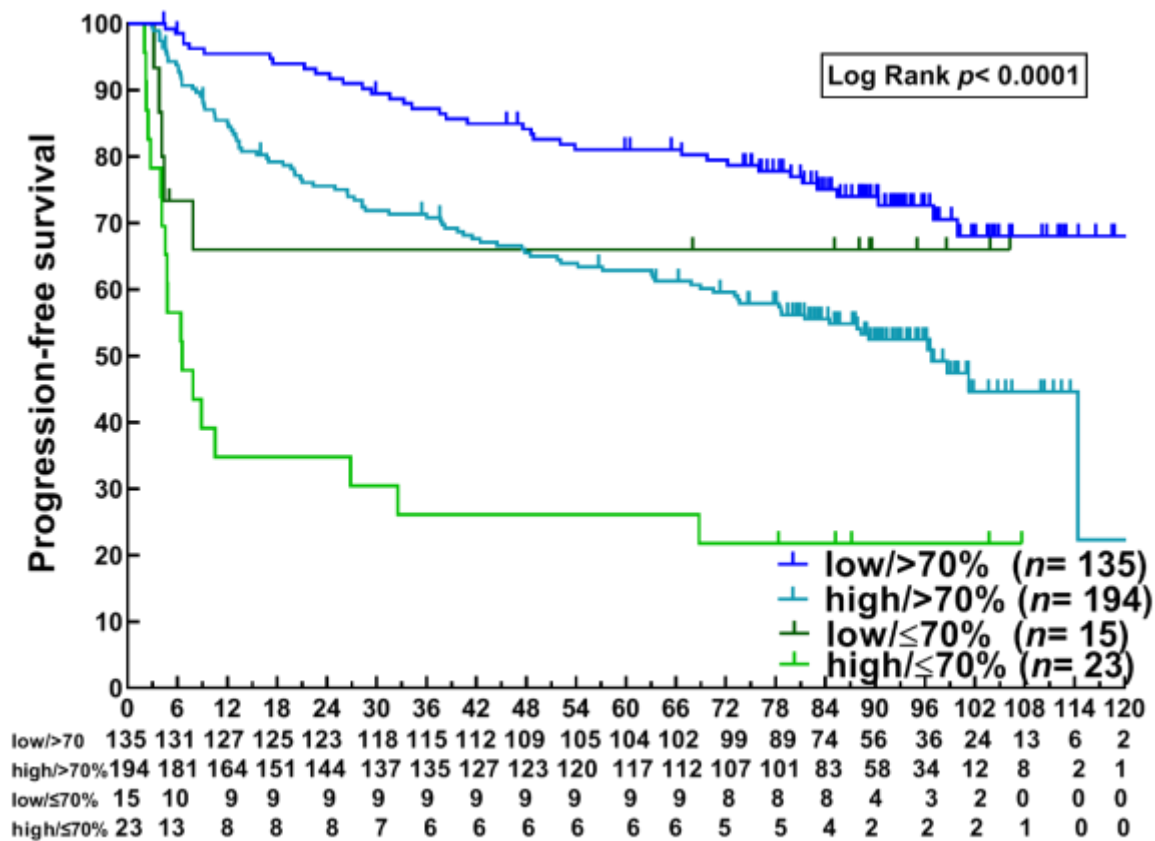

SUPPLEMENTAL FIGURE 3 Kaplan-Meier curves for progression-free survival in months stratified by combined aaPI and  $\Delta$ SUVmax subgroups.

### **3. SECONDARY OUTCOME MEASURES**

#### **Definitions:**

Overall survival (OS) was defined as time from randomisation to death, patients still alive were censored at date of last contact.

#### **Kaplan-Meier curves for OS**



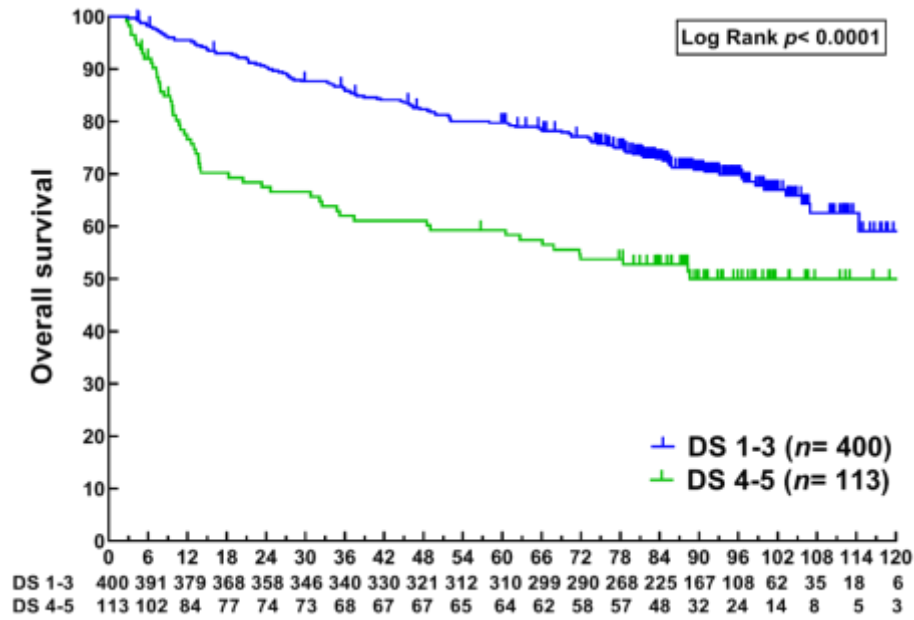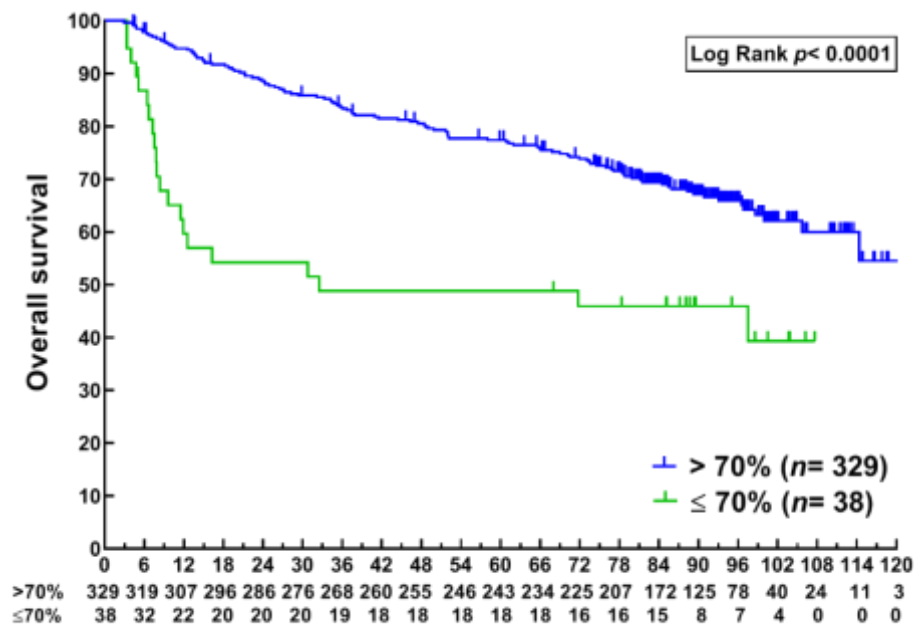

**SUPPLEMENTAL FIGURE 4** Kaplan-Meier curves with numbers at risk for overall survival in months stratified by I-PET4 result according to DS (4a) and according to  $\Delta$ SUVmax result (4b).

**SUPPLEMENTAL TABLE 5 Diagnostic and prognostic measures for baseline MTV, for different cut-off values for the Deauville 5-point scale at I-PET4, and  $\Delta$ SUVmax for 2-year OS**

|                                  |                            | Diagnostic information              |                                     |                       |                       | Prognostic information          | Discrimination   |
|----------------------------------|----------------------------|-------------------------------------|-------------------------------------|-----------------------|-----------------------|---------------------------------|------------------|
|                                  |                            | Negative Predictive Value % (95%CI) | Positive Predictive Value % (95%CI) | Sensitivity % (95%CI) | Specificity % (95%CI) | Univariate Hazard Ratio (95%CI) | AUC (95%CI)      |
| <b>Baseline MTV</b>              | <b>≤345ml vs &gt;345ml</b> | 90.5 (84.4-94.4)                    | 20.1 (14.6-27.0)                    | 71.1 (56.6-82.3)      | 49.9 (43.3-55.6)      | 2.23 (1.17-4.24)                | 0.59 (0.52-0.66) |
| <b>I-PET4</b>                    | <b>DS1 vs DS2-5</b>        | 87.6 (82.0-91.7)                    | 15.5 (12.0-19.8)                    | 70.3 (59.1-79.5)      | 35.5 (31.2-40.1)      | 1.29 (0.79-2.13)                | 0.53 (0.47-0.64) |
|                                  | <b>DS1-2 vs DS3-5</b>      | 90.3 (86.4-93.2)                    | 20.6 (15.8-26.4)                    | 62.2 (50.8-72.4)      | 59.7 (55.0-64.2)      | 2.35 (1.47-3.75)                | 0.61 (0.55-0.66) |
|                                  | <b>DS1-3 vs DS4-5</b>      | 90.5 (87.2-93.0)                    | 31.6 (24.0-40.9)                    | 48.7 (37.6-59.8)      | 82.5 (78.6-85.7)      | 4.02 (2.55-6.35)                | 0.65 (0.61-0.70) |
|                                  | <b>DS1-4 vs DS5</b>        | 88.3 (85.2-90.9)                    | 68.0 (48.4-82.8)                    | 23.0 (14.9-33.7)      | 98.2 (96.5-99.1)      | 9.85 (5.69-17.03)               | 0.60 (0.58-0.62) |
| <b><math>\Delta</math>SUVmax</b> | <b>&gt;70% vs ≤70%</b>     | 88.8 (84.9-91.7)                    | 44.7 (30.2-60.3)                    | 31.5 (20.7-44.7)      | 93.3 (90.0-95.6)      | 5.52 (3.10-9.83)                | 0.62 (0.59-0.66) |

*Abbreviations: 95%CI= 95% confidence interval; AUC= area under the receiver operating curve; DS= Deauville 5-point scale;  $\Delta$ SUVmax= reduction of maximum standardized uptake value between baseline and interim 18F-FDG PET(/CT); I-PET= interim 18F-FDG PET(/CT) after four cycles; MTV= metabolic tumor volume; OS= overall survival*

**SUPPLEMENTAL TABLE 6 Uni- and multivariable Cox Proportional Hazard analyses of  $\Delta$ SUVmax analysis-group for 2-year OS ( $n=367$ )**

|                                                                                    | 2-year OS                |                 |                             |                 |
|------------------------------------------------------------------------------------|--------------------------|-----------------|-----------------------------|-----------------|
|                                                                                    | Univariate<br>HR (95%CI) | <i>p</i> -value | Multivariable<br>HR (95%CI) | <i>p</i> -value |
| <b>Age (<math>\leq 60</math> vs <math>&gt;60</math>)</b>                           | 1.65 (0.88-3.08)         | 0.116           | 1.92 (1.01-3.62)            | 0.046*          |
| <b>aaIPI (low/low-intermediate vs high-intermediate/high)</b>                      | 2.85 (1.47-5.52)         | 0.0002*         | 2.42 (1.24-4.76)            | 0.010*          |
| <b>B symptoms (no vs yes)</b>                                                      | 2.12 (1.23-3.65)         | 0.0007*         | 1.82 (1.01-3.16)            | 0.036*          |
| <b><math>\Delta</math>SUVmax (<math>&gt;70\%</math> vs <math>\leq 70\%</math>)</b> | 5.52 (3.10-9.83)         | $<0.0001^*$     | 6.03 (3.36-10.81)           | $<0.0001^*$     |
| <b>Gender (male vs female)</b>                                                     | 0.68 (0.40-1.18)         | 0.172           | 0.55 (0.31-0.95)            | 0.034*          |
| <b>Treatment arm (R-CHOP14 vs RR-CHOP14)</b>                                       | 1.01 (0.59-1.72)         | 0.969           |                             |                 |

\* Statistically significant difference

Abbreviations: 95%CI= 95% confidence interval; aaIPI= age-adjusted international prognostic index;  $\Delta$ SUVmax= reduction of maximum standardized uptake value between baseline and interim  $^{18}$ F-FDG PET(/CT); HR= Hazard Ratio; OS= overall survival

**SUPPLEMENTAL TABLE 7 Uni- and multivariable Cox Proportional Hazard analyses including baseline MTV for 2-year OS (n=296)**

|                                                               | 2-year OS                |          |                             |          |
|---------------------------------------------------------------|--------------------------|----------|-----------------------------|----------|
|                                                               | Univariate<br>HR (95%CI) | p-value  | Multivariable<br>HR (95%CI) | p-value  |
| <b>Age (≤60 vs &gt;60)</b>                                    | 1.36 (0.70-2.62)         | 0.367    |                             |          |
| <b>aalPI (low/low-intermediate vs high-intermediate/high)</b> | 2.43 (1.20-4.91)         | 0.013*   |                             |          |
| <b>B symptoms (no vs yes)</b>                                 | 2.15 (1.19-3.91)         | 0.012*   |                             |          |
| <b>Baseline MTV log-transformed</b>                           | 1.62 (1.25-2.08)         | 0.0002*  | 1.55 (1.20-2.00)            | 0.001*   |
| <b>ΔSUVmax (&gt;70% vs ≤70%)</b>                              | 7.33 (3.97-13.55)        | <0.0001* | 6.75 (3.63-12.55)           | <0.0001* |
| <b>Gender (male vs female)</b>                                | 0.67 (0.37-1.21)         | 0.182    |                             |          |
| <b>Treatment arm (R-CHOP14 vs RR-CHOP14)</b>                  | 0.97 (0.54-1.74)         | 0.923    |                             |          |

\* Statistically significant difference

Abbreviations: 95%CI= 95% confidence interval; aalPI= age-adjusted international prognostic index; HR= Hazard Ratio; MTV=metabolic tumor volume; OS= overall survival
